# Supplementary material for: Mortality Rate in a Cohort of People Living With HIV in Rural Tanzania After Accounting for Unseen Deaths Among Those Lost to Follow-up
Source: PubMed Central journal article supplement — Am J Epidemiol. 2020 Sep 5;190(2):251–64. doi: 10.1093/aje/kwaa176 (PMC7850129; doi:10.1093/aje/kwaa176), 2020-09-05
Supplement: web_material_kwaa176.pdf [file web_material_kwaa176.pdf]

# Mortality Rate in a Cohort of People Living With HIV in Rural Tanzania After Accounting for Unseen

## Mortality Among Those Lost to Follow-up

Fiona Vanobberghen, Maja Weisser, Bryson Kasuga, Andrew Katende, Manuel Battegay, Marcel Tanner, and Tracy R. Glass on behalf of the KIULARCO Study Group

### Contents

|                                                                                                                                                                                                                                              |    |
|----------------------------------------------------------------------------------------------------------------------------------------------------------------------------------------------------------------------------------------------|----|
| Web Table 1. Covariate specifications for multiple imputation, weight estimation models and outcome models.....                                                                                                                              | 2  |
| Web Table 2. Characteristics of KIULARCO participants at enrollment among those lost to follow-up at database censoring on November 15, 2015, by whether tracing was attempted. ....                                                         | 4  |
| Web Table 3. Characteristics of KIULARCO participants among those attempted traced, by whether successfully traced.....                                                                                                                      | 6  |
| Web Table 4. Tracing of KIULARCO participants by when lost to follow-up.....                                                                                                                                                                 | 8  |
| Web Table 5. Characteristics of KIULARCO participants at enrollment among those successfully traced, by tracing outcome. ....                                                                                                                | 9  |
| Web Table 6. Factors associated with mortality in KIULARCO participants under four different methods of mortality estimation, including only participants with complete baseline data, Ifakara, Tanzania, 2005–2015. ....                    | 11 |
| Web Table 7. Factors associated with mortality in KIULARCO participants under four different methods of mortality estimation, among participants who were observed to initiate ART (from ART initiation), Ifakara, Tanzania, 2005–2015. .... | 13 |
| Web Figure 1. Probability of survival following ART initiation in KIULARCO, estimated according to four different methods, Ifakara, Tanzania, 2005–2015. ....                                                                                | 15 |
| References.....                                                                                                                                                                                                                              | 16 |

**Web Table 1. Covariate specifications for multiple imputation, weight estimation models and outcome models**

| Covariate                                               | Specification for multiple imputation                                         | Specification for weight models <sup>a</sup>                         | Specification for outcome (mortality) model                          |
|---------------------------------------------------------|-------------------------------------------------------------------------------|----------------------------------------------------------------------|----------------------------------------------------------------------|
| <b>Baseline covariates</b>                              |                                                                               |                                                                      |                                                                      |
| Year of enrollment                                      | Categorical, individual years                                                 | Categorical, individual years                                        | 2005-07, 2008-10, 2011-12, 2013-15 <sup>1</sup>                      |
| Sex                                                     | Female, male (logit)                                                          | Female, male                                                         | Female, male                                                         |
| Age, years                                              | Natural log transformation                                                    | Linear, centred                                                      | 15-24, 25-34, 35-44, ≥44                                             |
| Marital status                                          | Married/cohabiting, never married, separated/divorced, widowed/other (mlogit) | Married/cohabiting, never married, separated/divorced, widowed/other | Married/cohabiting, never married, separated/divorced, widowed/other |
| Partner HIV status                                      | Positive, negative, unknown, not applicable (mlogit)                          | Positive, negative, unknown, not applicable                          | Positive, negative, unknown, not applicable                          |
| Disclosure of HIV status                                | No, yes (logit)                                                               | No, yes                                                              | No, yes                                                              |
| Referred to clinic as hospital in-patient               | No, yes (logit)                                                               | No, yes                                                              | No, yes                                                              |
| Distance from centre of ward of residence to clinic, km | 1, 2-<50, 50-<80, ≥80 (mlogit)                                                | 1, 2-<50, 50-<80, ≥80                                                | 1, 2-<50, 50-<80, ≥80                                                |
| Smoking                                                 | Never, stopped, current (mlogit)                                              | Never, stopped, current                                              | Never/stopped, current                                               |
| Pregnant                                                | No, yes                                                                       | No, yes                                                              | No, yes                                                              |
| BMI, <sup>b</sup> kg/m <sup>2</sup>                     | Square root transformed (truncated regression with lower limit 3)             | Linear, centred                                                      | <18.5, 18.5-<25, 25-<30, ≥30 <sup>2</sup>                            |
| WHO stage                                               | 1, 2, 3, 4 (mlogit)                                                           | 1, 2, 3, 4                                                           | 1, 2, 3, 4                                                           |
| CD4 count, cells/mm <sup>3</sup>                        | Square root transformed (truncated regression with lower limit 0)             | Linear, centred                                                      | <200, 200-349, ≥350                                                  |
| Tuberculosis                                            | No, yes                                                                       | No, yes                                                              | No, yes                                                              |
| <b>Time-dependent covariates</b>                        |                                                                               |                                                                      |                                                                      |
| Year LTFU                                               | -                                                                             | Categorical, individual years                                        | -                                                                    |
| Time since ART initiation during follow-up, months      | 0, <6, 6-<12, 12-<24, ≥24 (at end of follow-up)                               | 0, <6, 6-<12, ≥12 (at end of follow-up)                              | 0, <6, 6-<12, ≥12 (time-dependent)                                   |

| Covariate                                | Specification for multiple imputation                               | Specification for weight models <sup>a</sup> | Specification for outcome (mortality) model |
|------------------------------------------|---------------------------------------------------------------------|----------------------------------------------|---------------------------------------------|
| Number of gaps in care (periods of LTFU) | 0, 1, 2, ≥3 (at end of follow-up)                                   | 0, 1, 2, ≥3 (at end of follow-up)            | 0, 1, 2, ≥3 (time-dependent)                |
| Time between LTFU and attempted traced   | -                                                                   | Linear (model for successful tracing only)   | -                                           |
| Attempted traced                         | No (including for those not lost), yes                              | -                                            | -                                           |
| Successfully traced                      | No (including for those lost or lost but not attempted traced), yes | -                                            | -                                           |
| Outcome died                             | No, yes                                                             | -                                            | -                                           |
| Hazard                                   | Nelson-Aalen estimator of the baseline cumulative hazard            | -                                            | -                                           |

ART, antiretroviral therapy.

<sup>a</sup>Models are with outcome (a) attempted traced and (b) successfully traced.

<sup>b</sup>Body mass index (BMI) calculated as weight in kilograms divided by height in meters squared.

**Web Table 2. Characteristics of KIULARCO participants at enrollment among those lost to follow-up at database censoring on November 15, 2015, by whether tracing was attempted**

| Participant characteristic at enrollment      | Tracing attempted |            | Total       |
|-----------------------------------------------|-------------------|------------|-------------|
|                                               | No                | Yes        |             |
| Number                                        | 901 (31%)         | 2010 (69%) | 2911 (100%) |
| Year of enrollment                            |                   |            |             |
| 2005-07                                       | 325 (39%)         | 507 (61%)  | 832 (100%)  |
| 2008-09                                       | 309 (28%)         | 803 (72%)  | 1112 (100%) |
| 2010-12                                       | 181 (25%)         | 531 (75%)  | 712 (100%)  |
| 2013-15                                       | 86 (34%)          | 169 (66%)  | 255 (100%)  |
| Sex                                           |                   |            |             |
| Male                                          | 337 (31%)         | 765 (69%)  | 1102 (100%) |
| Female                                        | 564 (31%)         | 1245 (69%) | 1809 (100%) |
| Age, years                                    |                   |            |             |
| 15-24                                         | 71 (29%)          | 176 (71%)  | 247 (100%)  |
| 25-34                                         | 312 (30%)         | 737 (70%)  | 1049 (100%) |
| 35-44                                         | 321 (34%)         | 629 (66%)  | 950 (100%)  |
| ≥45                                           | 197 (30%)         | 468 (70%)  | 665 (100%)  |
| Marital status                                |                   |            |             |
| Married/cohabiting                            | 460 (32%)         | 983 (68%)  | 1443 (100%) |
| Never married                                 | 186 (29%)         | 453 (71%)  | 639 (100%)  |
| Separated/divorced                            | 130 (29%)         | 325 (71%)  | 455 (100%)  |
| Widowed/other                                 | 99 (34%)          | 188 (66%)  | 287 (100%)  |
| Missing                                       | 26 (30%)          | 61 (70%)   | 87 (100%)   |
| HIV status of partner                         |                   |            |             |
| Positive                                      | 93 (31%)          | 207 (69%)  | 300 (100%)  |
| Negative                                      | 55 (30%)          | 126 (70%)  | 181 (100%)  |
| Unknown                                       | 688 (31%)         | 1522 (69%) | 2210 (100%) |
| Not applicable                                | 23 (30%)          | 54 (70%)   | 77 (100%)   |
| Missing                                       | 42 (29%)          | 101 (71%)  | 143 (100%)  |
| Disclosure of HIV status                      |                   |            |             |
| No                                            | 287 (34%)         | 568 (66%)  | 855 (100%)  |
| Yes                                           | 390 (27%)         | 1041 (73%) | 1431 (100%) |
| Missing                                       | 224 (36%)         | 401 (64%)  | 625 (100%)  |
| Referred to clinic as hospital in-patient     |                   |            |             |
| No                                            | 782 (31%)         | 1761 (69%) | 2543 (100%) |
| Yes                                           | 32 (27%)          | 88 (73%)   | 120 (100%)  |
| Missing                                       | 87 (35%)          | 161 (65%)  | 248 (100%)  |
| Distance of ward of residence from clinic, km |                   |            |             |
| 1                                             | 121 (11%)         | 950 (89%)  | 1071 (100%) |
| 2-<50                                         | 133 (35%)         | 251 (65%)  | 384 (100%)  |
| 50-<80                                        | 225 (58%)         | 160 (42%)  | 385 (100%)  |
| ≥80                                           | 178 (36%)         | 318 (64%)  | 496 (100%)  |
| Missing                                       | 244 (42%)         | 331 (58%)  | 575 (100%)  |
| Smoking                                       |                   |            |             |
| Never/stopped                                 | 728 (32%)         | 1539 (68%) | 2267 (100%) |
| Current                                       | 108 (26%)         | 311 (74%)  | 419 (100%)  |
| Missing                                       | 65 (29%)          | 160 (71%)  | 225 (100%)  |
| Pregnant                                      |                   |            |             |

| Participant characteristic at enrollment   | Tracing attempted |            | Total       |
|--------------------------------------------|-------------------|------------|-------------|
|                                            | No                | Yes        |             |
| No                                         | 535 (31%)         | 1164 (69%) | 1699 (100%) |
| Yes                                        | 29 (26%)          | 81 (74%)   | 110 (100%)  |
| BMI, kg/m <sup>2</sup>                     |                   |            |             |
| Underweight (<18.5)                        | 126 (33%)         | 260 (67%)  | 386 (100%)  |
| Normal (18.5-<25)                          | 263 (31%)         | 594 (69%)  | 857 (100%)  |
| Overweight (25-<30)                        | 47 (31%)          | 107 (69%)  | 154 (100%)  |
| Obese (≥30)                                | 11 (28%)          | 29 (73%)   | 40 (100%)   |
| Missing                                    | 454 (31%)         | 1020 (69%) | 1474 (100%) |
| WHO stage                                  |                   |            |             |
| 1                                          | 305 (30%)         | 728 (70%)  | 1033 (100%) |
| 2                                          | 160 (29%)         | 388 (71%)  | 548 (100%)  |
| 3                                          | 230 (30%)         | 526 (70%)  | 756 (100%)  |
| 4                                          | 134 (36%)         | 238 (64%)  | 372 (100%)  |
| Missing                                    | 72 (36%)          | 130 (64%)  | 202 (100%)  |
| CD4 count, cells/mm <sup>3</sup>           |                   |            |             |
| <100                                       | 114 (29%)         | 284 (71%)  | 398 (100%)  |
| 100-199                                    | 82 (31%)          | 180 (69%)  | 262 (100%)  |
| 200-349                                    | 85 (28%)          | 218 (72%)  | 303 (100%)  |
| ≥350                                       | 137 (25%)         | 406 (75%)  | 543 (100%)  |
| Missing                                    | 483 (34%)         | 922 (66%)  | 1405 (100%) |
| Tuberculosis                               |                   |            |             |
| No                                         | 834 (31%)         | 1874 (69%) | 2708 (100%) |
| Yes                                        | 67 (33%)          | 136 (67%)  | 203 (100%)  |
| Initiated ART within 30 days of enrollment |                   |            |             |
| No                                         | 618 (32%)         | 1306 (68%) | 1924 (100%) |
| Yes                                        | 283 (29%)         | 704 (71%)  | 987 (100%)  |

Results are number (row %). ART, antiretroviral therapy; BMI, body mass index (missing for pregnant women).

**Web Table 3. Characteristics of KIULARCO participants among those attempted traced, by whether successfully traced**

| Participant characteristic at enrollment      | Successfully traced |           | Total       |
|-----------------------------------------------|---------------------|-----------|-------------|
|                                               | No                  | Yes       |             |
| Number                                        | 1685 (84%)          | 325 (16%) | 2010 (100%) |
| Year of enrollment                            |                     |           |             |
| 2005-07                                       | 428 (84%)           | 79 (16%)  | 507 (100%)  |
| 2008-09                                       | 675 (84%)           | 128 (16%) | 803 (100%)  |
| 2010-12                                       | 446 (84%)           | 85 (16%)  | 531 (100%)  |
| 2013-15                                       | 136 (80%)           | 33 (20%)  | 169 (100%)  |
| Sex                                           |                     |           |             |
| Male                                          | 646 (84%)           | 119 (16%) | 765 (100%)  |
| Female                                        | 1039 (83%)          | 206 (17%) | 1245 (100%) |
| Age, years                                    |                     |           |             |
| 15-24                                         | 148 (84%)           | 28 (16%)  | 176 (100%)  |
| 25-34                                         | 609 (83%)           | 128 (17%) | 737 (100%)  |
| 35-44                                         | 533 (85%)           | 96 (15%)  | 629 (100%)  |
| ≥45                                           | 395 (84%)           | 73 (16%)  | 468 (100%)  |
| Marital status                                |                     |           |             |
| Married/cohabiting                            | 827 (84%)           | 156 (16%) | 983 (100%)  |
| Never married                                 | 385 (85%)           | 68 (15%)  | 453 (100%)  |
| Separated/divorced                            | 265 (82%)           | 60 (18%)  | 325 (100%)  |
| Widowed/other                                 | 155 (82%)           | 33 (18%)  | 188 (100%)  |
| Missing                                       | 53 (87%)            | 8 (13%)   | 61 (100%)   |
| HIV status of partner                         |                     |           |             |
| Positive                                      | 172 (83%)           | 35 (17%)  | 207 (100%)  |
| Negative                                      | 109 (87%)           | 17 (13%)  | 126 (100%)  |
| Unknown                                       | 1269 (83%)          | 253 (17%) | 1522 (100%) |
| Not applicable                                | 46 (85%)            | 8 (15%)   | 54 (100%)   |
| Missing                                       | 89 (88%)            | 12 (12%)  | 101 (100%)  |
| Disclosure of HIV status                      |                     |           |             |
| No                                            | 472 (83%)           | 96 (17%)  | 568 (100%)  |
| Yes                                           | 865 (83%)           | 176 (17%) | 1041 (100%) |
| Missing                                       | 348 (87%)           | 53 (13%)  | 401 (100%)  |
| Referred to clinic as hospital in-patient     |                     |           |             |
| No                                            | 1474 (84%)          | 287 (16%) | 1761 (100%) |
| Yes                                           | 77 (88%)            | 11 (13%)  | 88 (100%)   |
| Missing                                       | 134 (83%)           | 27 (17%)  | 161 (100%)  |
| Distance of ward of residence from clinic, km |                     |           |             |
| 1                                             | 796 (84%)           | 154 (16%) | 950 (100%)  |
| 2-<50                                         | 216 (86%)           | 35 (14%)  | 251 (100%)  |
| 50-<80                                        | 119 (74%)           | 41 (26%)  | 160 (100%)  |
| ≥80                                           | 260 (82%)           | 58 (18%)  | 318 (100%)  |
| Missing                                       | 294 (89%)           | 37 (11%)  | 331 (100%)  |
| Smoking                                       |                     |           |             |
| Never/stopped                                 | 1289 (84%)          | 250 (16%) | 1539 (100%) |
| Current                                       | 257 (83%)           | 54 (17%)  | 311 (100%)  |
| Missing                                       | 139 (87%)           | 21 (13%)  | 160 (100%)  |
| Pregnant                                      |                     |           |             |
| No                                            | 971 (83%)           | 193 (17%) | 1164 (100%) |

| Participant characteristic at enrollment   | Successfully traced |           | Total       |
|--------------------------------------------|---------------------|-----------|-------------|
|                                            | No                  | Yes       |             |
| Yes                                        | 68 (84%)            | 13 (16%)  | 81 (100%)   |
| BMI, kg/m <sup>2</sup>                     |                     |           |             |
| Underweight (<18.5)                        | 215 (83%)           | 45 (17%)  | 260 (100%)  |
| Normal (18.5-<25)                          | 490 (82%)           | 104 (18%) | 594 (100%)  |
| Overweight (25-<30)                        | 91 (85%)            | 16 (15%)  | 107 (100%)  |
| Obese (≥30)                                | 27 (93%)            | 2 (7%)    | 29 (100%)   |
| Missing                                    | 862 (85%)           | 158 (15%) | 1020 (100%) |
| WHO stage                                  |                     |           |             |
| 1                                          | 620 (85%)           | 108 (15%) | 728 (100%)  |
| 2                                          | 318 (82%)           | 70 (18%)  | 388 (100%)  |
| 3                                          | 431 (82%)           | 95 (18%)  | 526 (100%)  |
| 4                                          | 206 (87%)           | 32 (13%)  | 238 (100%)  |
| Missing                                    | 110 (85%)           | 20 (15%)  | 130 (100%)  |
| CD4 count, cells/mm <sup>3</sup>           |                     |           |             |
| <100                                       | 239 (84%)           | 45 (16%)  | 284 (100%)  |
| 100-199                                    | 153 (85%)           | 27 (15%)  | 180 (100%)  |
| 200-349                                    | 177 (81%)           | 41 (19%)  | 218 (100%)  |
| ≥350                                       | 330 (81%)           | 76 (19%)  | 406 (100%)  |
| Missing                                    | 786 (85%)           | 136 (15%) | 922 (100%)  |
| Tuberculosis                               |                     |           |             |
| No                                         | 1573 (84%)          | 301 (16%) | 1874 (100%) |
| Yes                                        | 112 (82%)           | 24 (18%)  | 136 (100%)  |
| Initiated ART within 30 days of enrollment |                     |           |             |
| No                                         | 1083 (83%)          | 223 (17%) | 1306 (100%) |
| Yes                                        | 602 (86%)           | 102 (14%) | 704 (100%)  |

Results are number (row %). ART, antiretroviral therapy; BMI, body mass index (missing for pregnant women).

**Web Table 4. Tracing of KIULARCO participants by when lost to follow-up**

|                                                              | Year lost to follow-up |           |           |           | Total       |
|--------------------------------------------------------------|------------------------|-----------|-----------|-----------|-------------|
|                                                              | 2005-07                | 2008-09   | 2010-12   | 2013-15   |             |
| Number (row %)                                               | 374 (13%)              | 815 (28%) | 913 (31%) | 809 (28%) | 2911 (100%) |
| Attempted traced, number<br>(column %)                       | 219 (59%)              | 597 (73%) | 650 (71%) | 544 (67%) | 2010 (69%)  |
| Successfully traced, number<br>(% of those attempted traced) | 22 (10%)               | 107 (18%) | 111 (17%) | 85 (16%)  | 325 (16%)   |
| Tracing outcome, number (%<br>of those successfully traced)  |                        |           |           |           |             |
| Died                                                         | 12 (55%)               | 46 (43%)  | 51 (46%)  | 22 (26%)  | 131 (40%)   |
| Transferred out                                              | 8 (36%)                | 49 (46%)  | 35 (32%)  | 38 (45%)  | 130 (40%)   |
| Returned to care                                             | 0                      | 0         | 2 (2%)    | 5 (6%)    | 7 (2%)      |
| Did not want care                                            | 2 (10%)                | 12 (11%)  | 23 (21%)  | 20 (24%)  | 57 (18%)    |



**Web Table 5. Characteristics of KIULARCO participants at enrollment among those successfully traced, by tracing outcome**

| Participant characteristic at enrollment      | Tracing outcome  |           |                 |                   | Total      |
|-----------------------------------------------|------------------|-----------|-----------------|-------------------|------------|
|                                               | Returned to care | Died      | Transferred out | Did not want care |            |
| Number                                        | 7 (2%)           | 131 (40%) | 130 (40%)       | 57 (18%)          | 325 (100%) |
| Year of enrollment                            |                  |           |                 |                   |            |
| 2005-07                                       | 0 (0%)           | 36 (46%)  | 33 (42%)        | 10 (13%)          | 79 (100%)  |
| 2008-09                                       | 1 (1%)           | 44 (34%)  | 65 (51%)        | 18 (14%)          | 128 (100%) |
| 2010-12                                       | 3 (4%)           | 42 (49%)  | 16 (19%)        | 24 (28%)          | 85 (100%)  |
| 2013-15                                       | 3 (9%)           | 9 (27%)   | 16 (48%)        | 5 (15%)           | 33 (100%)  |
| Sex                                           |                  |           |                 |                   |            |
| Male                                          | 2 (2%)           | 55 (46%)  | 30 (25%)        | 32 (27%)          | 119 (100%) |
| Female                                        | 5 (2%)           | 76 (37%)  | 100 (49%)       | 25 (12%)          | 206 (100%) |
| Age, years                                    |                  |           |                 |                   |            |
| 15-24                                         | 1 (4%)           | 6 (21%)   | 12 (43%)        | 9 (32%)           | 28 (100%)  |
| 25-34                                         | 4 (3%)           | 45 (35%)  | 51 (40%)        | 28 (22%)          | 128 (100%) |
| 35-44                                         | 2 (2%)           | 40 (42%)  | 37 (39%)        | 17 (18%)          | 96 (100%)  |
| ≥45                                           | 0 (0%)           | 40 (55%)  | 30 (41%)        | 3 (4%)            | 73 (100%)  |
| Marital status                                |                  |           |                 |                   |            |
| Married/cohabiting                            | 4 (3%)           | 59 (38%)  | 63 (40%)        | 30 (19%)          | 156 (100%) |
| Never married                                 | 0 (0%)           | 25 (37%)  | 27 (40%)        | 16 (24%)          | 68 (100%)  |
| Separated/divorced                            | 1 (2%)           | 28 (47%)  | 24 (40%)        | 7 (12%)           | 60 (100%)  |
| Widowed/other                                 | 2 (6%)           | 15 (45%)  | 13 (39%)        | 3 (9%)            | 33 (100%)  |
| Missing                                       | 0 (0%)           | 4 (50%)   | 3 (38%)         | 1 (13%)           | 8 (100%)   |
| HIV status of partner                         |                  |           |                 |                   |            |
| Positive                                      | 2 (6%)           | 9 (26%)   | 14 (40%)        | 10 (29%)          | 35 (100%)  |
| Negative                                      | 0 (0%)           | 5 (29%)   | 8 (47%)         | 4 (24%)           | 17 (100%)  |
| Unknown                                       | 4 (2%)           | 109 (43%) | 99 (39%)        | 41 (16%)          | 253 (100%) |
| Not applicable                                | 0 (0%)           | 4 (50%)   | 4 (50%)         | 0 (0%)            | 8 (100%)   |
| Missing                                       | 1 (8%)           | 4 (33%)   | 5 (42%)         | 2 (17%)           | 12 (100%)  |
| Disclosure of HIV status                      |                  |           |                 |                   |            |
| No                                            | 1 (1%)           | 45 (47%)  | 34 (35%)        | 16 (17%)          | 96 (100%)  |
| Yes                                           | 5 (3%)           | 64 (36%)  | 75 (43%)        | 32 (18%)          | 176 (100%) |
| Missing                                       | 1 (2%)           | 22 (42%)  | 21 (40%)        | 9 (17%)           | 53 (100%)  |
| Referred to clinic as hospital in-patient     |                  |           |                 |                   |            |
| No                                            | 7 (2%)           | 111 (39%) | 120 (42%)       | 49 (17%)          | 287 (100%) |
| Yes                                           | 0 (0%)           | 5 (45%)   | 4 (36%)         | 2 (18%)           | 11 (100%)  |
| Missing                                       | 0 (0%)           | 15 (56%)  | 6 (22%)         | 6 (22%)           | 27 (100%)  |
| Distance of ward of residence from clinic, km |                  |           |                 |                   |            |
| 1                                             | 5 (3%)           | 76 (49%)  | 40 (26%)        | 33 (21%)          | 154 (100%) |
| 2-<50                                         | 2 (6%)           | 15 (43%)  | 9 (26%)         | 9 (26%)           | 35 (100%)  |
| 50-<80                                        | 0 (0%)           | 3 (7%)    | 36 (88%)        | 2 (5%)            | 41 (100%)  |
| ≥80                                           | 0 (0%)           | 23 (40%)  | 31 (53%)        | 4 (7%)            | 58 (100%)  |
| Missing                                       | 0 (0%)           | 14 (38%)  | 14 (38%)        | 9 (24%)           | 37 (100%)  |
| Smoking                                       |                  |           |                 |                   |            |
| Never/stopped                                 | 6 (2%)           | 102 (41%) | 96 (38%)        | 46 (18%)          | 250 (100%) |
| Current                                       | 0 (0%)           | 22 (41%)  | 25 (46%)        | 7 (13%)           | 54 (100%)  |

| Participant characteristic at enrollment   | Tracing outcome  |           |                 |                   | Total      |
|--------------------------------------------|------------------|-----------|-----------------|-------------------|------------|
|                                            | Returned to care | Died      | Transferred out | Did not want care |            |
| Missing                                    | 1 (5%)           | 7 (33%)   | 9 (43%)         | 4 (19%)           | 21 (100%)  |
| Pregnant                                   |                  |           |                 |                   |            |
| No                                         | 5 (3%)           | 71 (37%)  | 93 (48%)        | 24 (12%)          | 193 (100%) |
| Yes                                        | 0 (0%)           | 5 (38%)   | 7 (54%)         | 1 (8%)            | 13 (100%)  |
| BMI, kg/m <sup>2</sup>                     |                  |           |                 |                   |            |
| Underweight (<18.5)                        | 1 (2%)           | 26 (58%)  | 11 (24%)        | 7 (16%)           | 45 (100%)  |
| Normal (18.5-<25)                          | 4 (4%)           | 43 (41%)  | 33 (32%)        | 24 (23%)          | 104 (100%) |
| Overweight (25-<30)                        | 2 (13%)          | 4 (25%)   | 8 (50%)         | 2 (13%)           | 16 (100%)  |
| Obese (≥30)                                | 0 (0%)           | 0 (0%)    | 2 (100%)        | 0 (0%)            | 2 (100%)   |
| Missing                                    | 0 (0%)           | 58 (37%)  | 76 (48%)        | 24 (15%)          | 158 (100%) |
| WHO stage                                  |                  |           |                 |                   |            |
| 1                                          | 3 (3%)           | 33 (31%)  | 49 (45%)        | 23 (21%)          | 108 (100%) |
| 2                                          | 3 (4%)           | 26 (37%)  | 33 (47%)        | 8 (11%)           | 70 (100%)  |
| 3                                          | 0 (0%)           | 49 (52%)  | 29 (31%)        | 17 (18%)          | 95 (100%)  |
| 4                                          | 0 (0%)           | 14 (44%)  | 11 (34%)        | 7 (22%)           | 32 (100%)  |
| Missing                                    | 1 (5%)           | 9 (45%)   | 8 (40%)         | 2 (10%)           | 20 (100%)  |
| CD4 count, cells/mm <sup>3</sup>           |                  |           |                 |                   |            |
| <100                                       | 1 (2%)           | 23 (51%)  | 17 (38%)        | 4 (9%)            | 45 (100%)  |
| 100-199                                    | 0 (0%)           | 13 (48%)  | 10 (37%)        | 4 (15%)           | 27 (100%)  |
| 200-349                                    | 1 (2%)           | 15 (37%)  | 15 (37%)        | 10 (24%)          | 41 (100%)  |
| ≥350                                       | 3 (4%)           | 20 (26%)  | 37 (49%)        | 16 (21%)          | 76 (100%)  |
| Missing                                    | 2 (1%)           | 60 (44%)  | 51 (38%)        | 23 (17%)          | 136 (100%) |
| Tuberculosis                               |                  |           |                 |                   |            |
| No                                         | 6 (2%)           | 122 (41%) | 120 (40%)       | 53 (18%)          | 301 (100%) |
| Yes                                        | 1 (4%)           | 9 (38%)   | 10 (42%)        | 4 (17%)           | 24 (100%)  |
| Initiated ART within 30 days of enrollment |                  |           |                 |                   |            |
| No                                         | 5 (2%)           | 82 (37%)  | 91 (41%)        | 45 (20%)          | 223 (100%) |
| Yes                                        | 2 (2%)           | 49 (48%)  | 39 (38%)        | 12 (12%)          | 102 (100%) |

Results are number (row %). ART, antiretroviral therapy; BMI, body mass index (missing for pregnant women).

**Web Table 6. Factors associated with mortality in KIULARCO participants under four different methods of mortality estimation, including only participants with complete baseline data, Ifakara, Tanzania, 2005–2015**

|                                               | Method A: data as captured in database |           | Method B: incorporating tracing outcomes |           | Method C: Frangakis & Rubin approach |           | Method D: extension to Frangakis & Rubin approach |           |
|-----------------------------------------------|----------------------------------------|-----------|------------------------------------------|-----------|--------------------------------------|-----------|---------------------------------------------------|-----------|
| Number deaths/ participants <sup>a</sup>      | 81/1988                                |           | 115/1988                                 |           | 115/1486                             |           | 115/1486                                          |           |
| <b>Baseline covariates</b>                    |                                        |           |                                          |           |                                      |           |                                                   |           |
| Year of enrollment                            |                                        |           |                                          |           |                                      |           |                                                   |           |
| 2005-07                                       | 0.80                                   | 0.27,2.38 | 0.89                                     | 0.36,2.26 | 1.09                                 | 0.35,3.37 | 0.92                                              | 0.31,2.73 |
| 2008-09                                       | 1                                      |           | 1                                        |           | 1                                    |           | 1                                                 |           |
| 2010-12                                       | 0.85                                   | 0.45,1.63 | 1.18                                     | 0.71,1.96 | 2.05                                 | 1.07,3.95 | 1.79                                              | 0.98,3.28 |
| 2013-15                                       | 0.69                                   | 0.32,1.47 | 0.93                                     | 0.47,1.85 | 1.21                                 | 0.38,3.84 | 1.24                                              | 0.43,3.61 |
| Sex                                           |                                        |           |                                          |           |                                      |           |                                                   |           |
| Male                                          | 1.20                                   | 0.72,1.98 | 1.34                                     | 0.88,2.05 | 1.55                                 | 0.91,2.63 | 1.69                                              | 1.02,2.82 |
| Female                                        | 1                                      |           | 1                                        |           | 1                                    |           | 1                                                 |           |
| Age, years                                    |                                        |           |                                          |           |                                      |           |                                                   |           |
| 15-24                                         | 1.25                                   | 0.48,3.27 | 0.70                                     | 0.28,1.73 | 0.12                                 | 0.03,0.59 | 0.18                                              | 0.04,0.75 |
| 25-34                                         | 1.04                                   | 0.57,1.91 | 0.93                                     | 0.56,1.55 | 0.86                                 | 0.45,1.62 | 0.98                                              | 0.53,1.81 |
| 35-44                                         | 1                                      |           | 1                                        |           | 1                                    |           | 1                                                 |           |
| ≥45                                           | 1.42                                   | 0.80,2.51 | 1.43                                     | 0.90,2.29 | 1.38                                 | 0.75,2.52 | 1.40                                              | 0.79,2.49 |
| Marital status                                |                                        |           |                                          |           |                                      |           |                                                   |           |
| Married/cohabiting                            | 1                                      |           | 1                                        |           | 1                                    |           | 1                                                 |           |
| Never married                                 | 1.11                                   | 0.55,2.25 | 0.96                                     | 0.52,1.77 | 1.22                                 | 0.61,2.42 | 1.08                                              | 0.59,1.95 |
| Separated/divorced                            | 0.70                                   | 0.35,1.42 | 0.83                                     | 0.47,1.44 | 1.22                                 | 0.62,2.39 | 1.18                                              | 0.62,2.26 |
| Widowed/other                                 | 1.63                                   | 0.83,3.18 | 1.49                                     | 0.83,2.66 | 1.47                                 | 0.74,2.91 | 1.39                                              | 0.69,2.80 |
| HIV status of partner                         |                                        |           |                                          |           |                                      |           |                                                   |           |
| Positive                                      | 1                                      |           | 1                                        |           | 1                                    |           | 1                                                 |           |
| Negative                                      | 2.88                                   | 0.90,9.18 | 1.82                                     | 0.67,4.92 | 1.07                                 | 0.20,5.80 | 1.18                                              | 0.25,5.53 |
| Unknown                                       | 2.44                                   | 0.99,6.03 | 2.09                                     | 1.02,4.26 | 1.36                                 | 0.53,3.49 | 1.73                                              | 0.69,4.39 |
| Not applicable                                | 2.89                                   | 0.99,8.48 | 2.78                                     | 1.12,6.91 | 0.45                                 | 0.96,12.3 | 3.23                                              | 0.95,10.9 |
| Disclosure of HIV status                      |                                        |           |                                          |           |                                      |           |                                                   |           |
| No                                            | 1                                      |           | 1                                        |           | 1                                    |           | 1                                                 |           |
| Yes                                           | 0.95                                   | 0.56,1.62 | 1.03                                     | 0.66,1.62 | 1.09                                 | 0.60,1.96 | 1.05                                              | 0.61,1.81 |
| Referred to clinic as hospital in-patient     |                                        |           |                                          |           |                                      |           |                                                   |           |
| No                                            | 1                                      |           | 1                                        |           | 1                                    |           | 1                                                 |           |
| Yes                                           | 1.42                                   | 0.68,2.96 | 1.21                                     | 0.61,2.40 | 1.28                                 | 0.47,3.45 | 1.52                                              | 0.61,3.75 |
| Distance of ward of residence from clinic, km |                                        |           |                                          |           |                                      |           |                                                   |           |
| 1                                             | 1                                      |           | 1                                        |           | 1                                    |           | 1                                                 |           |
| 2-<50                                         | 0.48                                   | 0.26,0.91 | 0.45                                     | 0.26,0.77 | 0.75                                 | 0.34,1.67 | 0.70                                              | 0.35,1.44 |
| 50-<80                                        | 1.05                                   | 0.52,2.12 | 0.74                                     | 0.39,1.42 | 0.53                                 | 0.23,1.21 | 0.60                                              | 0.30,1.19 |
| ≥80                                           | 0.41                                   | 0.19,0.90 | 0.41                                     | 0.21,0.80 | 0.44                                 | 0.17,1.12 | 0.37                                              | 0.14,1.00 |
| Smoking                                       |                                        |           |                                          |           |                                      |           |                                                   |           |
| Never/stopped                                 | 1                                      |           | 1                                        |           | 1                                    |           | 1                                                 |           |
| Current                                       | 0.80                                   | 0.28,2.28 | 0.67                                     | 0.28,1.58 | 0.51                                 | 0.24,1.10 | 0.57                                              | 0.26,1.24 |

|                                                           | Method A: data as captured in database |            | Method B: incorporating tracing outcomes |            | Method C: Frangakis & Rubin approach |           | Method D: extension to Frangakis & Rubin approach |            |
|-----------------------------------------------------------|----------------------------------------|------------|------------------------------------------|------------|--------------------------------------|-----------|---------------------------------------------------|------------|
| <b>BMI, kg/m<sup>2</sup></b>                              |                                        |            |                                          |            |                                      |           |                                                   |            |
| Underweight (<18.5)                                       | 1.89                                   | 1.16,3.08  | 1.80                                     | 1.19,2.71  | 1.44                                 | 0.82,2.53 | 1.50                                              | 0.88,2.54  |
| Normal (18.5-<25)                                         | 1                                      |            | 1                                        |            | 1                                    |           | 1                                                 |            |
| Overweight (25-<30)                                       | 0.79                                   | 0.30,2.05  | 0.60                                     | 0.26,1.42  | 0.27                                 | 0.05,1.55 | 0.26                                              | 0.05,1.34  |
| Obese (≥30)                                               | 0.81                                   | 0.19,3.49  | 0.43                                     | 0.10,1.85  | 0.13                                 | 0.02,0.87 | 0.15                                              | 0.02,0.96  |
| <b>WHO stage</b>                                          |                                        |            |                                          |            |                                      |           |                                                   |            |
| 1                                                         | 1                                      |            | 1                                        |            | 1                                    |           | 1                                                 |            |
| 2                                                         | 2.10                                   | 1.06,4.16  | 2.23                                     | 1.28,3.86  | 2.20                                 | 1.05,4.62 | 2.13                                              | 1.03,4.44  |
| 3                                                         | 2.09                                   | 1.00,4.39  | 1.87                                     | 1.02,3.42  | 1.42                                 | 0.68,2.95 | 1.64                                              | 0.78,3.42  |
| 4                                                         | 3.16                                   | 1.38,7.22  | 2.96                                     | 1.46,6.02  | 2.48                                 | 0.83,7.43 | 2.59                                              | 0.95,7.07  |
| <b>CD4 count, cells/mm<sup>3</sup></b>                    |                                        |            |                                          |            |                                      |           |                                                   |            |
| <100                                                      | 1                                      |            | 1                                        |            | 1                                    |           | 1                                                 |            |
| 100-199                                                   | 0.62                                   | 0.32,1.19  | 0.53                                     | 0.30,0.93  | 0.35                                 | 0.17,0.72 | 0.32                                              | 0.17,0.62  |
| 200-349                                                   | 0.28                                   | 0.13,0.58  | 0.30                                     | 0.16,0.55  | 0.39                                 | 0.18,0.85 | 0.36                                              | 0.17,0.76  |
| ≥350                                                      | 0.13                                   | 0.06,0.28  | 0.12                                     | 0.06,0.24  | 0.15                                 | 0.05,0.44 | 0.12                                              | 0.05,0.34  |
| <b>Tuberculosis</b>                                       |                                        |            |                                          |            |                                      |           |                                                   |            |
| No                                                        | 1                                      |            | 1                                        |            | 1                                    |           | 1                                                 |            |
| Yes                                                       | 0.84                                   | 0.45,1.58  | 1.00                                     | 0.57,1.73  | 1.09                                 | 0.45,2.63 | 0.81                                              | 0.34,1.93  |
| <b>Time-dependent covariates</b>                          |                                        |            |                                          |            |                                      |           |                                                   |            |
| <b>Time since ART initiation during follow-up, months</b> |                                        |            |                                          |            |                                      |           |                                                   |            |
| Not yet initiated                                         | 1                                      |            | 1                                        |            | 1                                    |           | 1                                                 |            |
| >0-<6                                                     | 0.25                                   | 0.13,0.49  | 0.40                                     | 0.24,0.69  | 0.67                                 | 0.36,1.24 | 0.63                                              | 0.34,1.18  |
| 6-<12                                                     | 0.02                                   | 0.01,0.05  | 0.04                                     | 0.02,0.10  | 0.17                                 | 0.06,0.45 | 0.14                                              | 0.06,0.35  |
| ≥12                                                       | 0.01                                   | <0.01,0.02 | 0.01                                     | <0.01,0.02 | 0.02                                 | 0.01,0.06 | 0.01                                              | <0.01,0.05 |
| <b>Number of gaps in care (periods of LTFU)</b>           |                                        |            |                                          |            |                                      |           |                                                   |            |
| 0                                                         | 1                                      |            | 1                                        |            | 1                                    |           | 1                                                 |            |
| 1                                                         | 0.16                                   | 0.08,0.32  | 0.58                                     | 0.35,0.96  | 4.94                                 | 2.43,10.1 | 3.55                                              | 1.79,7.04  |
| 2                                                         | 0.12                                   | 0.03,0.57  | 0.47                                     | 0.19,1.16  | 3.35                                 | 1.28,8.76 | 2.54                                              | 1.03,6.27  |
| ≥3                                                        | 0.11                                   | 0.01,0.93  | 0.19                                     | 0.04,0.93  | 1.37                                 | 0.09,20.3 | 1.10                                              | 0.08,15.9  |

ART, antiretroviral therapy; BMI, body mass index; LTFU, lost to follow-up.

Results are hazard ratios and 95% confidence intervals. "1" indicates the reference category. Results are from multivariable Cox proportional hazards models, adjusted for all variables shown in the table. Since baseline BMI was missing for all pregnant women, it was not possible to include pregnancy in the models.

<sup>a</sup>Unweighted numbers.

**Web Table 7. Factors associated with mortality in KIULARCO participants under four different methods of mortality estimation, among participants who were observed to initiate ART (from ART initiation), Ifakara, Tanzania, 2005–2015**

|                                               | Method A: data as captured in database |           | Method B: incorporating tracing outcomes |           | Method C: Frangakis & Rubin approach |           | Method D: extension to Frangakis & Rubin approach |           |
|-----------------------------------------------|----------------------------------------|-----------|------------------------------------------|-----------|--------------------------------------|-----------|---------------------------------------------------|-----------|
| <b>Baseline covariates</b>                    |                                        |           |                                          |           |                                      |           |                                                   |           |
| Year of enrollment                            |                                        |           |                                          |           |                                      |           |                                                   |           |
| 2005-07                                       | 1.24                                   | 0.92,1.68 | 1.20                                     | 0.90,1.60 | 0.99                                 | 0.66,1.50 | 0.97                                              | 0.64,1.48 |
| 2008-09                                       | 1                                      |           | 1                                        |           | 1                                    |           | 1                                                 |           |
| 2010-12                                       | 0.71                                   | 0.52,0.98 | 1.00                                     | 0.76,1.32 | 2.19                                 | 1.50,3.20 | 1.94                                              | 1.35,2.79 |
| 2013-15                                       | 0.40                                   | 0.23,0.70 | 0.57                                     | 0.34,0.94 | 1.65                                 | 0.76,3.57 | 1.32                                              | 0.60,2.91 |
| Sex                                           |                                        |           |                                          |           |                                      |           |                                                   |           |
| Male                                          | 1.16                                   | 0.91,1.49 | 1.24                                     | 1.00,1.55 | 1.66                                 | 1.22,2.24 | 1.85                                              | 1.34,2.55 |
| Female                                        | 1                                      |           | 1                                        |           | 1                                    |           | 1                                                 |           |
| Age, years                                    |                                        |           |                                          |           |                                      |           |                                                   |           |
| 15-24                                         | 1.78                                   | 1.15,2.75 | 1.46                                     | 0.96,2.21 | 0.76                                 | 0.43,1.34 | 0.81                                              | 0.47,1.41 |
| 25-34                                         | 1.08                                   | 0.82,1.43 | 1.13                                     | 0.88,1.46 | 1.21                                 | 0.85,1.70 | 1.21                                              | 0.86,1.72 |
| 35-44                                         | 1                                      |           | 1                                        |           | 1                                    |           | 1                                                 |           |
| ≥45                                           | 1.26                                   | 0.95,1.67 | 1.30                                     | 1.01,1.67 | 1.44                                 | 1.03,2.03 | 1.22                                              | 0.86,1.75 |
| Marital status                                |                                        |           |                                          |           |                                      |           |                                                   |           |
| Married/cohabiting                            | 1                                      |           | 1                                        |           | 1                                    |           | 1                                                 |           |
| Never married                                 | 1.04                                   | 0.77,1.42 | 1.11                                     | 0.84,1.47 | 1.35                                 | 0.91,1.98 | 1.26                                              | 0.86,1.83 |
| Separated/divorced                            | 0.84                                   | 0.59,1.19 | 0.93                                     | 0.68,1.26 | 1.24                                 | 0.84,1.83 | 1.33                                              | 0.88,2.00 |
| Widowed/other                                 | 0.14                                   | 0.79,1.64 | 1.12                                     | 0.80,1.57 | 1.18                                 | 0.75,1.84 | 1.17                                              | 0.75,1.81 |
| HIV status of partner                         |                                        |           |                                          |           |                                      |           |                                                   |           |
| Positive                                      | 1                                      |           | 1                                        |           | 1                                    |           | 1                                                 |           |
| Negative                                      | 1.25                                   | 0.72,2.17 | 1.19                                     | 0.70,2.02 | 1.21                                 | 0.52,2.82 | 1.08                                              | 0.46,2.54 |
| Unknown                                       | 1.25                                   | 0.83,1.86 | 1.33                                     | 0.91,1.93 | 1.47                                 | 0.84,2.58 | 1.65                                              | 0.94,2.88 |
| Not applicable                                | 1.98                                   | 0.91,4.29 | 1.98                                     | 0.97,4.05 | 1.93                                 | 0.71,5.25 | 1.68                                              | 0.64,4.39 |
| Disclosure of HIV status                      |                                        |           |                                          |           |                                      |           |                                                   |           |
| No                                            | 1                                      |           | 1                                        |           | 1                                    |           | 1                                                 |           |
| Yes                                           | 1.31                                   | 1.00,1.71 | 1.21                                     | 0.96,1.53 | 1.05                                 | 0.76,1.44 | 1.13                                              | 0.81,1.57 |
| Referred to clinic as hospital in-patient     |                                        |           |                                          |           |                                      |           |                                                   |           |
| No                                            | 1                                      |           | 1                                        |           | 1                                    |           | 1                                                 |           |
| Yes                                           | 1.42                                   | 0.84,2.40 | 1.37                                     | 0.84,2.22 | 1.34                                 | 0.73,2.46 | 1.37                                              | 0.76,2.46 |
| Distance of ward of residence from clinic, km |                                        |           |                                          |           |                                      |           |                                                   |           |
| 1                                             | 1                                      |           | 1                                        |           | 1                                    |           | 1                                                 |           |
| 2-<50                                         | 0.71                                   | 0.49,1.01 | 0.75                                     | 0.55,1.03 | 0.96                                 | 0.65,1.42 | 0.99                                              | 0.66,1.49 |
| 50-<80                                        | 1.14                                   | 0.80,1.63 | 0.97                                     | 0.69,1.36 | 0.53                                 | 0.34,0.83 | 0.55                                              | 0.34,0.90 |
| ≥80                                           | 0.82                                   | 0.58,1.17 | 0.82                                     | 0.60,1.13 | 0.95                                 | 0.60,1.50 | 1.04                                              | 0.65,1.68 |
| Smoking                                       |                                        |           |                                          |           |                                      |           |                                                   |           |
| Never/stopped                                 | 1                                      |           | 1                                        |           | 1                                    |           | 1                                                 |           |
| Current                                       | 1.40                                   | 1.03,1.91 | 1.35                                     | 1.02,1.79 | 1.28                                 | 0.85,1.94 | 1.10                                              | 0.73,1.65 |
| Pregnant                                      |                                        |           |                                          |           |                                      |           |                                                   |           |
| No                                            | 1                                      |           | 1                                        |           | 1                                    |           | 1                                                 |           |

|                                          | Method A: data as captured in database |           | Method B: incorporating tracing outcomes |           | Method C: Frangakis & Rubin approach |           | Method D: extension to Frangakis & Rubin approach |           |
|------------------------------------------|----------------------------------------|-----------|------------------------------------------|-----------|--------------------------------------|-----------|---------------------------------------------------|-----------|
| Yes                                      | 0.72                                   | 0.32,1.65 | 0.84                                     | 0.41,1.72 | 1.70                                 | 0.65,4.44 | 2.02                                              | 0.69,5.89 |
| BMI, kg/m <sup>2</sup>                   |                                        |           |                                          |           |                                      |           |                                                   |           |
| Underweight (<18.5)                      | 1.63                                   | 1.17,2.29 | 1.63                                     | 1.20,2.22 | 1.58                                 | 1.13,2.23 | 1.53                                              | 1.08,2.17 |
| Normal (18.5-<25)                        | 1                                      |           | 1                                        |           | 1                                    |           | 1                                                 |           |
| Overweight (25-<30)                      | 0.65                                   | 0.35,1.22 | 0.66                                     | 0.37,1.18 | 0.66                                 | 0.31,1.40 | 0.69                                              | 0.33,1.44 |
| Obese (≥30)                              | 0.57                                   | 0.13,2.48 | 0.47                                     | 0.11,1.98 | 0.21                                 | 0.04,1.04 | 0.23                                              | 0.05,1.11 |
| WHO stage                                |                                        |           |                                          |           |                                      |           |                                                   |           |
| 1                                        | 1                                      |           | 1                                        |           | 1                                    |           | 1                                                 |           |
| 2                                        | 1.20                                   | 0.85,1.70 | 1.32                                     | 0.97,1.80 | 1.59                                 | 1.03,2.45 | 1.35                                              | 0.86,2.12 |
| 3                                        | 1.40                                   | 1.00,1.95 | 1.59                                     | 1.17,2.15 | 2.04                                 | 1.34,3.10 | 1.92                                              | 1.24,2.98 |
| 4                                        | 2.88                                   | 2.00,4.15 | 2.82                                     | 2.02,3.96 | 2.59                                 | 1.59,4.23 | 2.45                                              | 1.52,3.95 |
| CD4 count, cells/mm <sup>3</sup>         |                                        |           |                                          |           |                                      |           |                                                   |           |
| <100                                     | 1                                      |           | 1                                        |           | 1                                    |           | 1                                                 |           |
| 100-199                                  | 0.75                                   | 0.54,1.03 | 0.75                                     | 0.55,1.04 | 0.76                                 | 0.46,1.26 | 0.69                                              | 0.43,1.12 |
| 200-349                                  | 0.64                                   | 0.43,0.97 | 0.67                                     | 0.47,0.96 | 0.72                                 | 0.46,1.12 | 0.67                                              | 0.42,1.07 |
| ≥350                                     | 0.64                                   | 0.43,0.97 | 0.59                                     | 0.41,0.86 | 0.49                                 | 0.28,0.84 | 0.46                                              | 0.27,0.78 |
| Tuberculosis                             |                                        |           |                                          |           |                                      |           |                                                   |           |
| No                                       | 1                                      |           | 1                                        |           | 1                                    |           | 1                                                 |           |
| Yes                                      | 0.83                                   | 0.58,1.20 | 0.78                                     | 0.56,1.10 | 0.71                                 | 0.43,1.20 | 0.74                                              | 0.45,1.23 |
| <b>Time-dependent covariates</b>         |                                        |           |                                          |           |                                      |           |                                                   |           |
| Number of gaps in care (periods of LTFU) |                                        |           |                                          |           |                                      |           |                                                   |           |
| 0                                        | 1                                      |           | 1                                        |           | 1                                    |           | 1                                                 |           |
| 1                                        | 0.79                                   | 0.61,1.01 | 1.30                                     | 1.04,1.63 | 6.11                                 | 4.52,8.26 | 4.89                                              | 3.61,6.63 |
| 2                                        | 0.63                                   | 0.40,1.01 | 0.98                                     | 0.66,1.46 | 4.37                                 | 2.56,7.47 | 3.73                                              | 2.12,6.57 |
| ≥3                                       | 0.62                                   | 0.31,1.25 | 1.27                                     | 0.76,2.12 | 8.16                                 | 4.29,15.5 | 5.89                                              | 3.04,11.4 |

ART, antiretroviral therapy; BMI, body mass index; LTFU, lost to follow-up.

Results are hazard ratios and 95% confidence intervals. "1" indicates the reference category. Results are from multivariable Cox proportional hazards models, adjusted for all variables shown in the table, with multiple imputation for missing baseline covariates (see Methods section of text for details).

**Web Figure 1. Probability of survival following ART initiation in KIULARCO, estimated according to four different methods, Ifakara, Tanzania, 2005–2015**

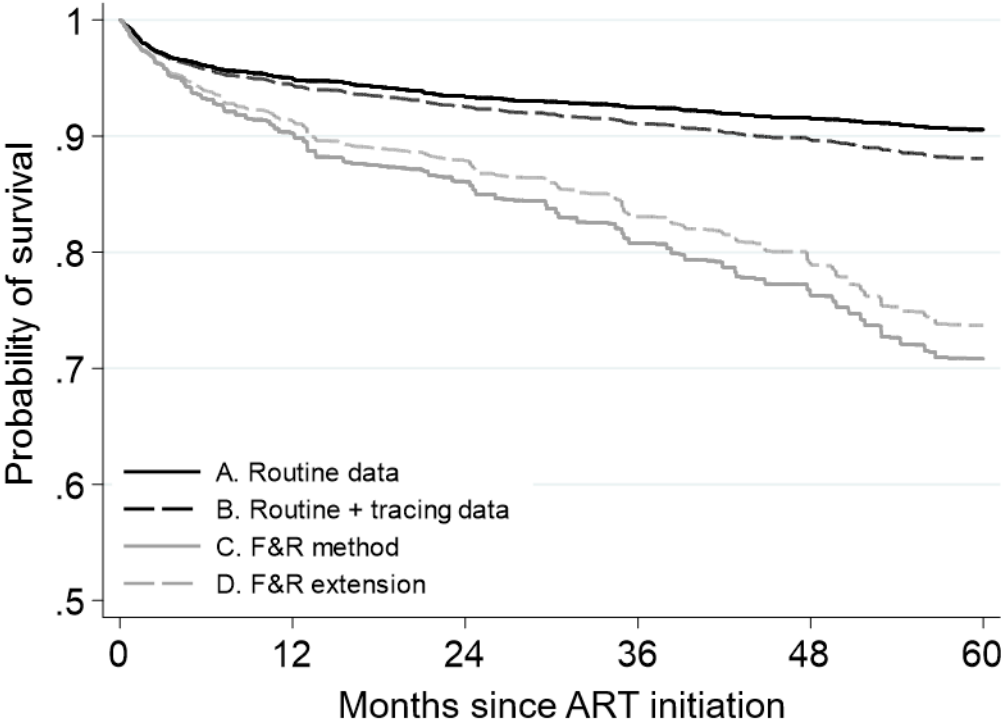

See Methods section of text for more details. F&R = Frangakis & Rubin.<sup>3</sup> One-year mortality was 5.0% (95% confidence interval 4.4,5.7), 5.6% (4.9,6.3), 9.7% (8.2,11.2), 8.6% (7.3,10.0) for methods A-D, respectively, and five-year mortality was 9.4% (8.4,10.6), 11.9% (10.8,13.2), 29.2% (25.7,32.7), 26.3% (22.9,29.7), respectively.

## References

1. Vanobberghen F, Letang E, Gamell A, et al. A decade of HIV care in rural Tanzania: Trends in clinical outcomes and impact of clinic optimisation in an open, prospective cohort. *PLOS ONE*. 2017 Jul 18;12(7):e0180983.
2. World Health Organization. Body mass index - BMI [Internet]. [cited 2017 Feb 23]. Available from: <http://www.euro.who.int/en/health-topics/disease-prevention/nutrition/a-healthy-lifestyle/body-mass-index-bmi>.
3. Frangakis CE, Rubin DB. Addressing an idiosyncrasy in estimating survival curves using double sampling in the presence of self-selected right censoring. *Biometrics*. 2001 Jun;57(2):333–342.
